# Supplementary material for: High Throughput Screening for Expanded CTG repeats in Myotonic Dystrophy Type 1 Using Melt Curve Analysis
Source: bioRxiv or medRxiv preprint supplement (doi:10.1101/2021.01.11.21249609), 2021-01-13
Supplement: Supplementary file [file media-1.pdf]

## Supplemental Tables and Figures—

### High Throughput Screening for Expanded CTG Repeats in Myotonic Dystrophy Type 1 Using Melt Curve Analysis. RJ Butterfield et al.

#### Supplemental Figure 1. Template for scoring TP-PCR melt curves.

Four examples of typical melt curves as reviewed by the blinded reviewers. Each sample classified into one of six categories based on visual inspection of the MCP: Normal, Intermediate, Premutation, Expanded, Uncertain, and Fail. The melt curve for the DBS samples (black) is plotted with averaged melt curves from the four positive (expanded) controls with (CTG)<sub>n</sub> ≥ 50 [5::75 (green), 5::80 (purple), 5::480 (light red), and 14:2530 (light blue)].

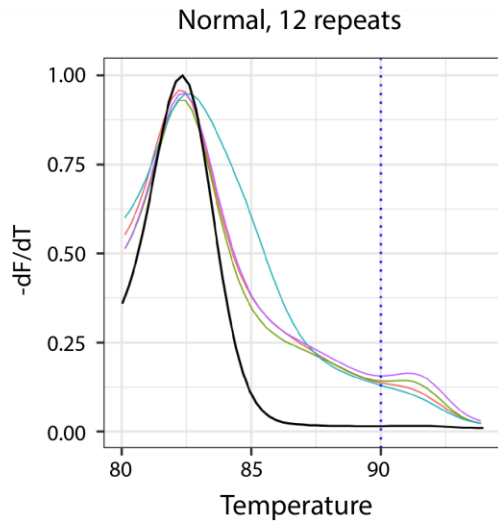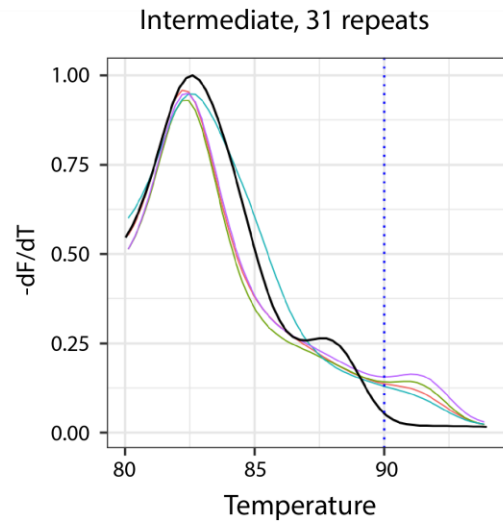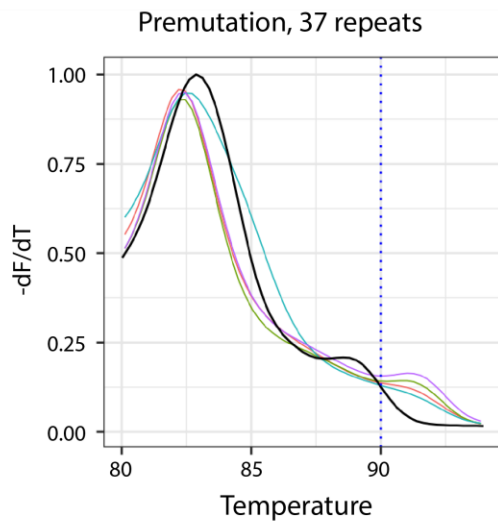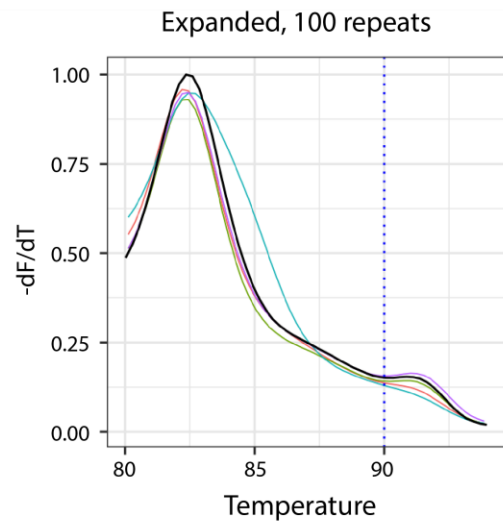

**Supplemental Figure 2. Melt curve profiles from all samples classified as ‘expanded’ by blinded scoring.** Each sample was reviewed by 4 blinded reviewers, with 16 samples resulting in a ‘expanded’ score based on the consensus of the reviewers. The melt curve for the DBS sample (black) is plotted with averaged melt curves from four positive (expanded) controls with (CTG)<sub>n</sub> ≥ 50: 5::75 (green), 5::80 (purple), 5::480 (light red), and 14:2530 (light blue). Repeat numbers for Allele 1:: Allele 2 by direct PCR or the Amplidex® DM1 Dx Kit are shown above each plot. Samples with true expansions are highlighted in yellow.

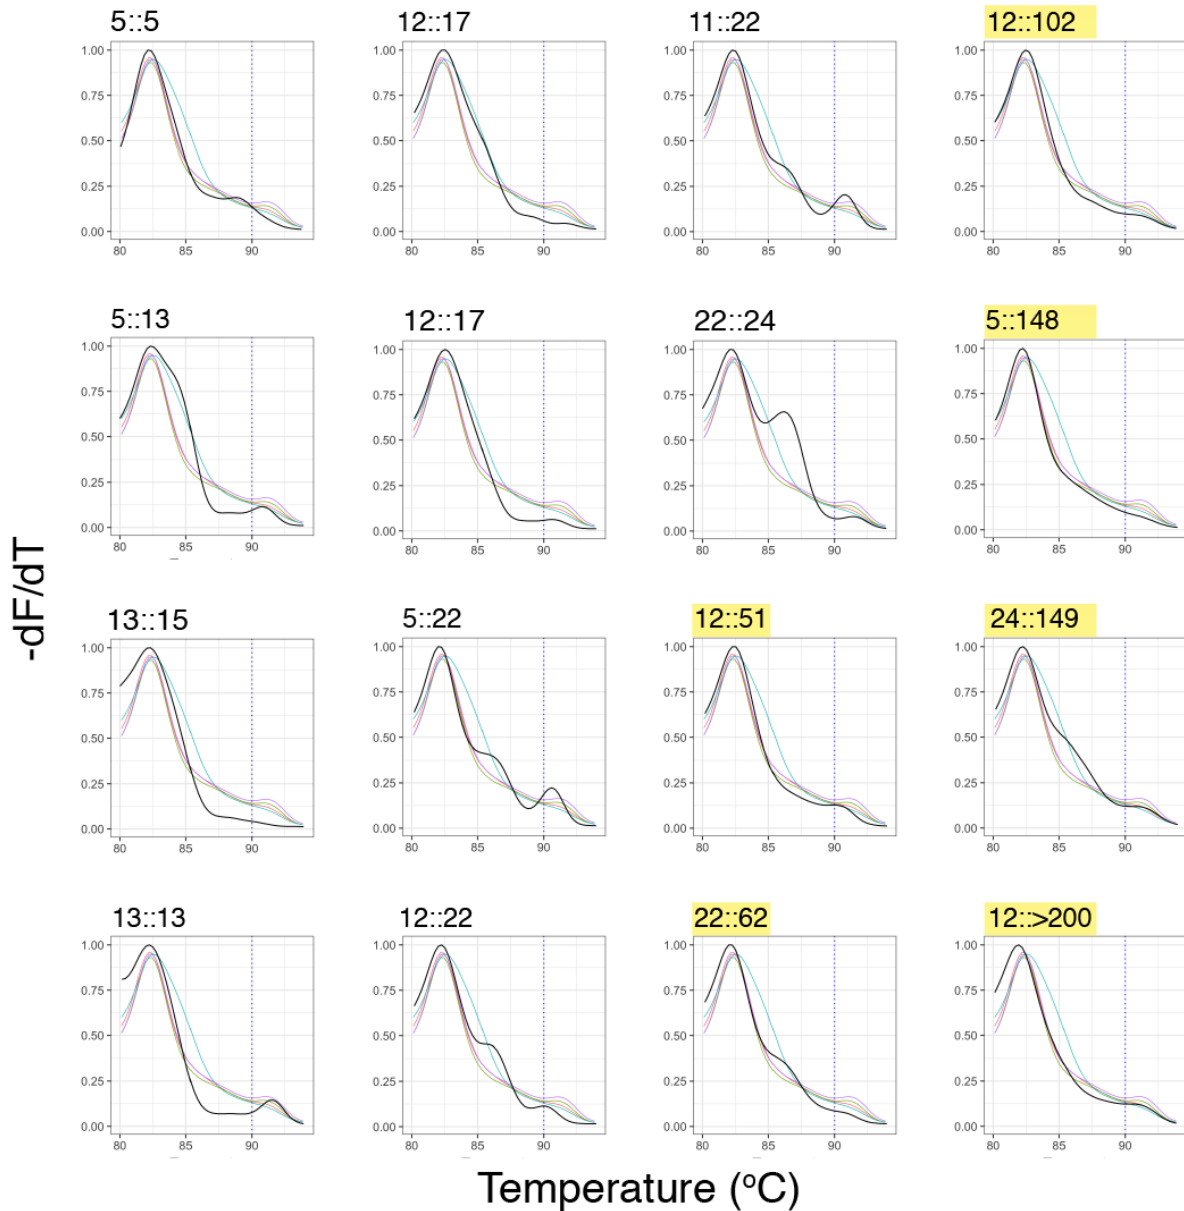

**Supplemental Figure 3. Individual scores of melt curve profiles and validated CTG repeat size from all samples classified as ‘premutation’ by blinded scoring.** Heatmap of individual calls from the four blinded reviewers and final CTG repeat numbers for Allele 1 :: Allele 2 by direct PCR or the Amplidex® DM1 Dx Kit are shown for each sample, with the true premutations boxed in yellow.

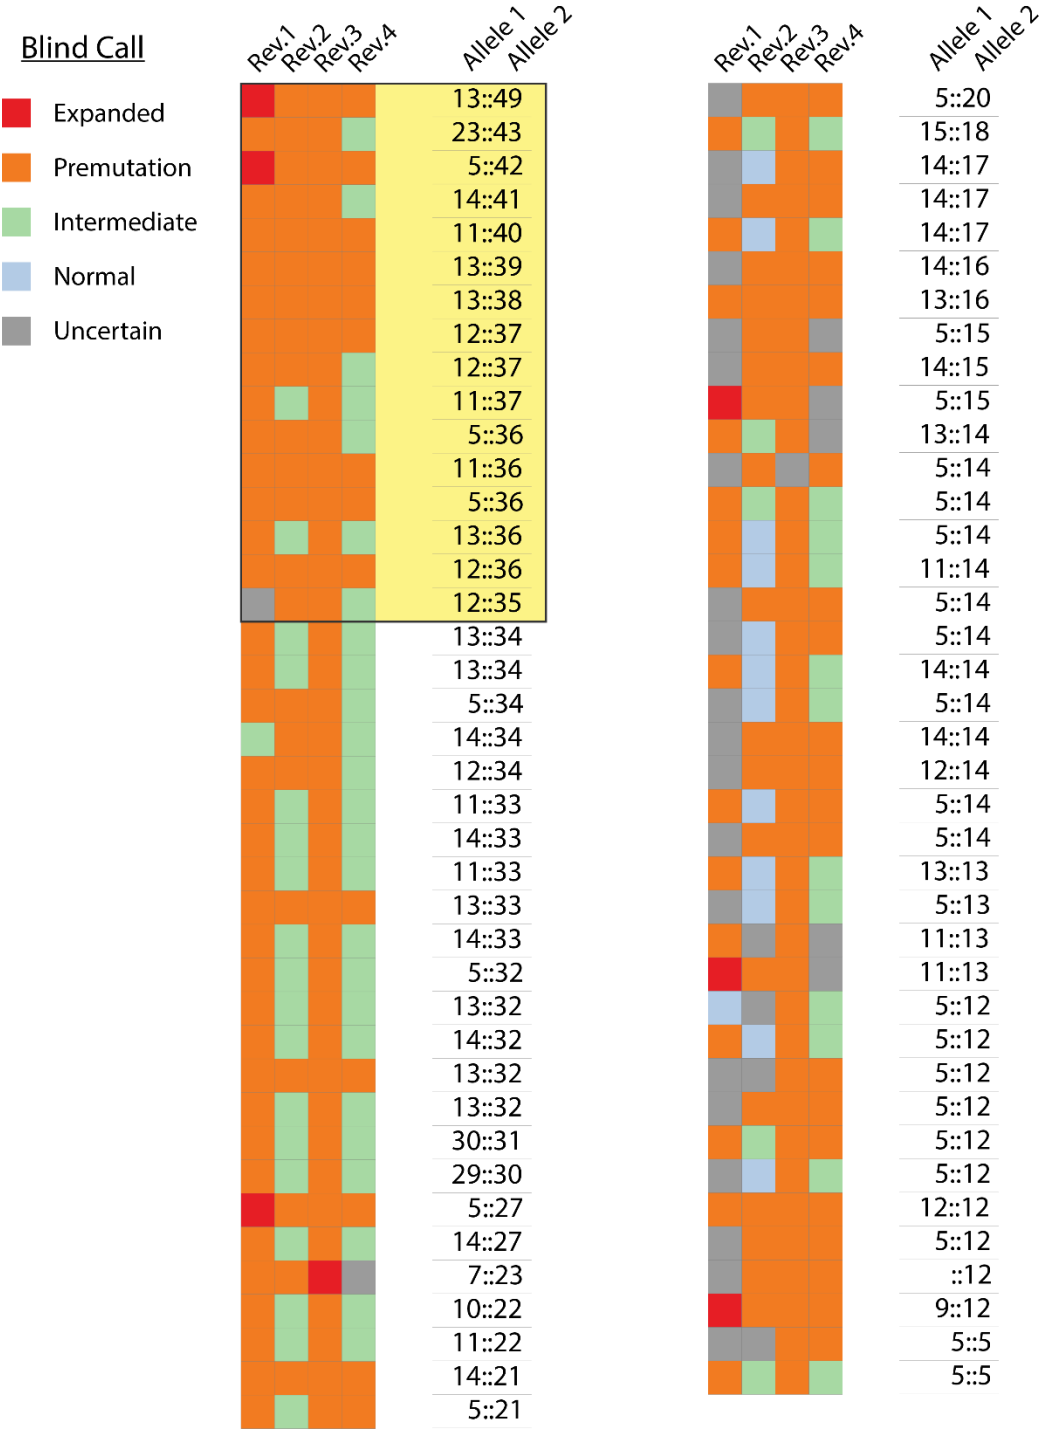

**Supplemental Table 1. Individual allele sizes and blinded scores from for control samples.**

| Sample ID | Diplotype Group <sup>†</sup> | Allele 1 (CTG) <sub>n</sub> | Allele 2 (CTG) <sub>n</sub> | Consensus Score from Blinded Review |
|-----------|------------------------------|-----------------------------|-----------------------------|-------------------------------------|
| 1         | (-+-)                        | 5                           | 5                           | Normal                              |
| 2         | (-+-)                        | 5                           | 5                           | Normal                              |
| 3         | (-+-)                        | 5                           | 5                           | Normal                              |
| 4         | (-+-)                        | 5                           | 5                           | Normal                              |
| 5         | (-+-)                        | 5                           | 5                           | Normal                              |
| 6         | (-+-)                        | 5                           | 5                           | Normal                              |
| 7         | (-+-)                        | 5                           | 5                           | Normal                              |
| 8         | (-+-)                        | 5                           | 5                           | Normal                              |
| 9         | (-+-)                        | 5                           | 5                           | Normal                              |
| 10        | (-+-)                        | 5                           | 5                           | Normal                              |
| 11        | (-+-)                        | 5                           | 5                           | Normal                              |
| 12        | (-+-)                        | 5                           | 5                           | Normal                              |
| 13        | (-+-)                        | 5                           | 5                           | Normal                              |
| 14        | (-+-)                        | 5                           | 5                           | Normal                              |
| 15        | (-+-)                        | 5                           | 5                           | Normal                              |
| 16        | (+++)                        | 8                           | 13                          | Normal                              |
| 17        | (+++)                        | 11                          | 11                          | Normal                              |
| 18        | (+++)                        | 12                          | 12                          | Normal                              |
| 19        | (+++)                        | 12                          | 12                          | Normal                              |
| 20        | (+++)                        | 13                          | 13                          | Normal                              |
| 21        | (+++)                        | 11                          | 13                          | Normal                              |
| 22        | (+++)                        | 12                          | 13                          | Normal                              |
| 23        | (+++)                        | 13                          | 13                          | Normal                              |
| 24        | (+++)                        | 12                          | 13                          | Normal                              |
| 25        | (+++)                        | 11                          | 13                          | Normal                              |
| 26        | (+++)                        | 12                          | 13                          | Normal                              |
| 27        | (+++)                        | 12                          | 13                          | Normal                              |
| 28        | (+++)                        | 12                          | 13                          | Normal                              |
| 29        | (+++)                        | 11                          | 13                          | Normal                              |
| 30        | (+++)                        | 14                          | 14                          | Normal                              |
| 31        | (---)                        | 14                          | 14                          | Normal                              |
| 32        | (---)                        | 14                          | 17                          | Normal                              |
| 33        | (---)                        | 14                          | 21                          | Intermediate                        |
| 34        | (---)                        | 14                          | 22                          | Intermediate                        |
| 35        | (---)                        | 22                          | 23                          | Intermediate                        |
| 36        | (---)                        | 14                          | 25                          | Intermediate                        |
| 37        | (---)                        | 14                          | 25                          | Intermediate                        |

|    |       |    |    |              |
|----|-------|----|----|--------------|
| 38 | (---) | 10 | 25 | Intermediate |
| 39 | (---) | 14 | 26 | Intermediate |
| 40 | (---) | 24 | 26 | Intermediate |
| 41 | (---) | 27 | 28 | Intermediate |
| 42 | (---) | 26 | 29 | Premutation  |
| 43 | (---) | 12 | 37 | Premutation  |
| 44 | (---) | 14 | 37 | Premutation  |
| 45 | (---) | 14 | 40 | Premutation  |

† Expected range for (CTG)<sub>n</sub> in the (-+-) haplotype=5, in the (+++) haplotype= 8-17 and in the (---) haplotype = 18-35.
